# Supplementary material for: Efficacy and safety of lenvatinib for preventing tumor recurrence after liver transplantation in hepatocellular carcinoma beyond the Milan criteria
Source: PubMed Central journal article supplement — Ann Transl Med. 2022 Oct;10(20):1091. doi: 10.21037/atm-22-1353 (PMC9652551; doi:10.21037/atm-22-1353), 2022-10
Supplement: atm-10-20-1091-supplementary.pdf [file atm-10-20-1091-supplementary.pdf]

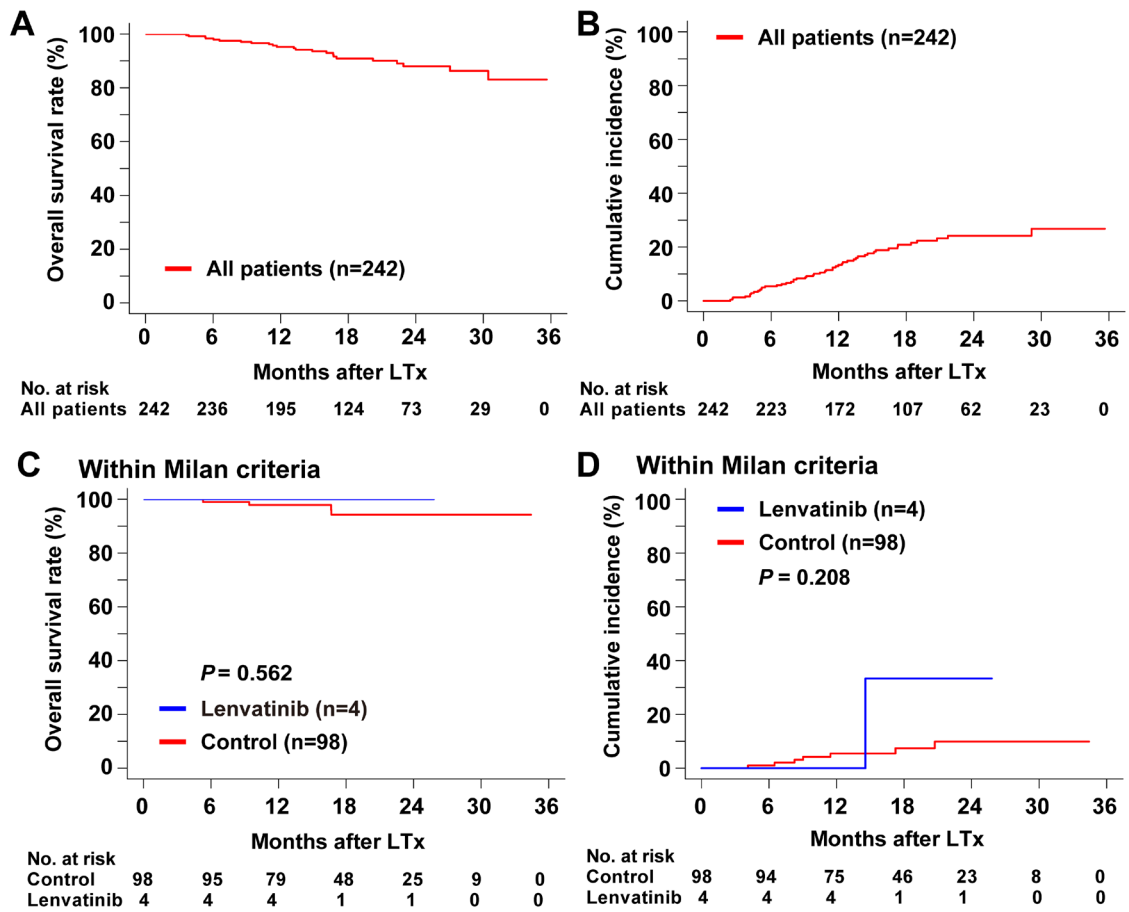

**Figure S1** Efficacy of postoperative lenvatinib treatment in patients with HCC within Milan criteria who underwent LTx. (A) Kaplan-Meier analysis of OS for all patients. (B) Competing risk analysis of cumulative incidences of recurrence for all patients. (C) Kaplan-Meier analysis of OS for patients with HCC within the Milan criteria in the lenvatinib and control groups. (D) Competing risk analysis of cumulative incidences of recurrence for patients with HCC within the Milan criteria in the lenvatinib and control groups. LTx, liver transplantation; OS, overall survival; HCC, hepatocellular carcinoma. HCC, hepatocellular carcinoma; LTx, liver transplantation; OS, overall survival.

**Table S1** Univariate analysis to identify independent risk factors of OS and TTR in all patients

| Variable                      | OS                |         | TTR              |         |
|-------------------------------|-------------------|---------|------------------|---------|
|                               | HR (95% CI)       | P value | sHR (95% CI)     | P value |
| Gender (female)               | 0.72 (0.17–3.08)  | 0.661   | 0.80 (0.34–1.89) | 0.610   |
| Age (>50 years)               | 0.99 (0.44–2.25)  | 0.987   | 0.83 (0.47–1.45) | 0.510   |
| HBsAg (positive)              | 0.62 (0.24–1.58)  | 0.316   | 1.87 (0.80–4.34) | 0.150   |
| AFP (>400 ng/mL)              | 0.62 (0.24–1.58)  | 0.320   | 3.30 (1.85–5.89) | <0.001  |
| PIVKA-II (>100 ng/mL)         | 6.32 (1.88–21.28) | 0.003   | 3.11 (1.62–5.94) | <0.001  |
| Child-Pugh class (B–C)        | 1.29 (0.55–3.05)  | 0.560   | 1.01 (0.55–1.87) | 0.970   |
| Cirrhosis (yes)               | 2.37 (1.00–5.59)  | 0.049   | 0.58 (0.31–1.11) | 0.100   |
| Tumor size (>5 cm)            | 3.53 (1.56–8.01)  | 0.003   | 2.75 (1.56–4.85) | <0.001  |
| Tumor number (multiple)       | 1.80 (0.67–4.84)  | 0.248   | 3.40 (1.52–7.63) | 0.003   |
| Edmondson stage (III–IV)      | 2.35 (0.96–5.72)  | 0.060   | 2.84 (1.53–5.27) | 0.001   |
| mVI (yes)                     | 1.65 (0.67–4.02)  | 0.273   | 2.54 (1.33–4.85) | 0.005   |
| Preoperative TACE             | 1.07 (0.45–2.53)  | 0.873   | 1.38 (0.78–2.43) | 0.270   |
| Duration of surgery (minutes) | 1.00 (0.99–1.01)  | 0.792   | 1.00 (0.99–1.00) | 0.840   |
| Blood loss (mL)               | 1.00 (1.00–1.00)  | 0.016   | 1.00 (1.00–1.00) | 0.270   |
| Warm ischemic time (minutes)  | 0.96 (0.90–1.02)  | 0.223   | 0.97 (0.94–1.01) | 0.110   |
| Lenvatinib (yes)              | 0.70 (0.21–2.36)  | 0.564   | 0.72 (0.33–1.57) | 0.410   |

OS, overall survival; TTR, time to recurrence; AFP, alpha-fetoprotein; CI, confidence interval; HbsAg, hepatitis B surface antigen; HCC, hepatocellular carcinoma; HR, hazard ratio; mVI, microvascular invasion; PIVKA-II, protein induced by vitamin K absence or antagonist-II; sHR, sub-hazard ratio; TACE, transarterial chemoembolization.

**Table S2** Baseline characteristics in patients with HCC undergoing LTx beyond Milan criteria after PSM

| Variable                      | Group    | Patients after PSM beyond Milan criteria (n=99) |                          |                    |
|-------------------------------|----------|-------------------------------------------------|--------------------------|--------------------|
|                               |          | Control (n=66)                                  | Lenvatinib (n=33)        | P value            |
| Gender                        | Male     | 63 (95.5)                                       | 31 (93.9)                | 0.746 <sup>a</sup> |
|                               | Female   | 3 (4.5)                                         | 2 (6.1)                  |                    |
| Age (years)                   | ≤50      | 33 (50.0)                                       | 17 (51.5)                | 0.887              |
|                               | >50      | 33 (50.0)                                       | 16 (48.5)                |                    |
| HBsAg                         | Negative | 11 (16.7)                                       | 7 (21.2)                 | 0.580              |
|                               | Positive | 55 (83.3)                                       | 26 (78.8)                |                    |
| AFP (ng/mL)                   | ≤400     | 52 (78.8)                                       | 26 (78.8)                | 1.000              |
|                               | >400     | 14 (21.2)                                       | 7 (21.2)                 |                    |
| PIVKA-II (mAU/mL)             | <100     | 20 (30.3)                                       | 9 (27.3)                 | 0.755              |
|                               | >100     | 46 (69.7)                                       | 24 (72.7)                |                    |
| Child–Pugh class              | A        | 52 (78.8)                                       | 26 (78.8)                | 1.000              |
|                               | B–C      | 14 (21.2)                                       | 7 (21.2)                 |                    |
| Cirrhosis                     | No       | 13 (19.7)                                       | 7 (21.2)                 | 0.860              |
|                               | Yes      | 53 (80.3)                                       | 26 (78.8)                |                    |
| Tumor size (cm)               | ≤5       | 35 (53.0)                                       | 18 (54.5)                | 0.887              |
|                               | >5       | 31 (47.0)                                       | 15 (45.5)                |                    |
| Tumor number                  | Single   | 9 (13.6)                                        | 5 (15.2)                 | 0.838 <sup>a</sup> |
|                               | Multiple | 57 (86.4)                                       | 28 (84.8)                |                    |
| Edmondson stage               | I–II     | 29 (43.9)                                       | 16 (48.5)                | 0.669              |
|                               | III–IV   | 37 (56.1)                                       | 17 (51.5)                |                    |
| mVI                           | No       | 22 (33.3)                                       | 11 (33.3)                | 1.000              |
|                               | Yes      | 44 (66.7)                                       | 22 (66.7)                |                    |
| CNLC stage                    | I        | 9 (13.6)                                        | 5 (15.2)                 | 0.838 <sup>a</sup> |
|                               | II       | 57 (86.4)                                       | 28 (84.8)                |                    |
| Milan criteria                | Within   | 0                                               | 0                        | /                  |
|                               | Beyond   | 102 (100.0)                                     | 38 (100.0)               |                    |
| Fudan criteria                | Within   | 13 (19.7)                                       | 6 (18.2)                 | 0.857              |
|                               | Beyond   | 53 (80.3)                                       | 27 (81.8)                |                    |
| Preoperative TACE             | No       | 35 (53.0)                                       | 19 (57.6)                | 0.669              |
|                               | Yes      | 31 (47.0)                                       | 14 (42.4)                |                    |
| Duration of surgery (minutes) |          | 305.00 [284.00, 332.00]                         | 302.00 [272.00, 330.00]  | 0.385 <sup>b</sup> |
| Blood loss (mL)               |          | 800.00 [500.00, 1200.00]                        | 800.00 [600.00, 1200.00] | 0.855 <sup>b</sup> |
| Warm ischemic time (minutes)  |          | 40.00 [36.25, 43.00]                            | 39.00 [36.00, 42.00]     | 0.330 <sup>b</sup> |

Categorical variables were summarized as n (%); continuous variables were summarized as median (interquartile range). <sup>a</sup> Continuous correction. <sup>b</sup> Wilcoxon rank-sum test. LTx, liver transplantation; PSM, propensity score matching; AFP, alpha-fetoprotein; CNLC, China Liver Cancer Stage; HBsAg, hepatitis B surface antigen; HCC, hepatocellular carcinoma; mVI, microvascular invasion; PIVKA-II, protein induced by vitamin K absence or antagonist-II; TACE, transarterial chemoembolization.

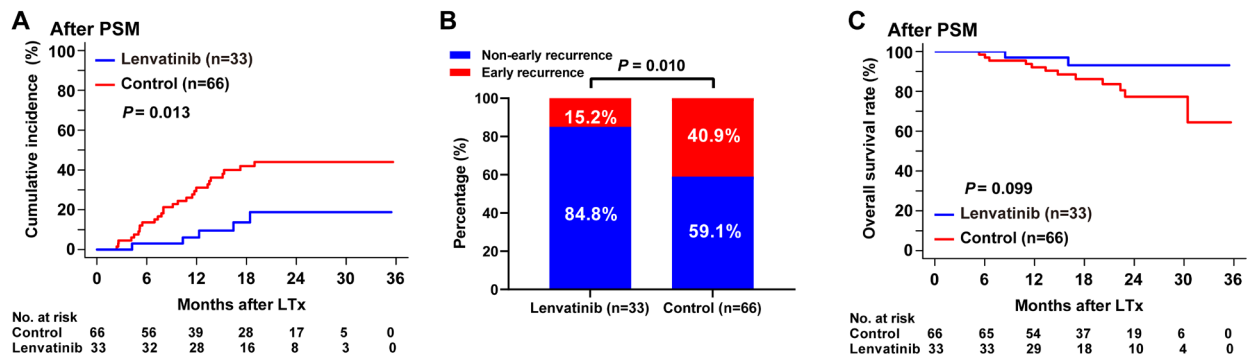

**Figure S2** Efficacy of postoperative lenvatinib treatment in patients with HCC beyond Milan criteria after PSM who underwent LTx. (A) Competing risk analysis of cumulative incidences of recurrence for patients with HCC beyond the Milan criteria in the lenvatinib and control groups after PSM. (B) The correlation between adjuvant lenvatinib and early recurrence ( $\leq 2$  years) in patients with HCC beyond the Milan criteria after PSM. (C) Kaplan-Meier analysis of OS for patients with HCC beyond the Milan criteria in the lenvatinib and control groups after PSM. HCC, hepatocellular carcinoma; LTx, liver transplantation; OS, overall survival; PSM, propensity score matching.

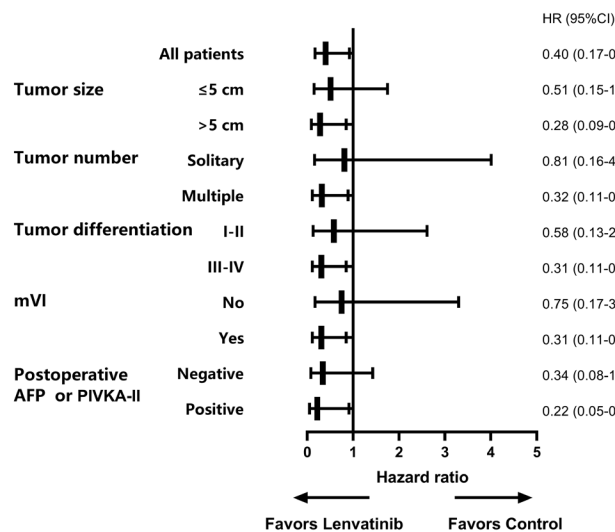

**Figure S3** Forest plot of subgroup analyses for time to recurrence using a competing risk model in patients with HCC beyond Milan criteria who underwent LTx. The characteristics in subgroup analyses included tumor size, tumor number, tumor differentiation, mVI, and postoperative AFP or PIVKA-II. Postoperative AFP or PIVKA-II positive means AFP  $> 20$  ng/mL or PIVKA-II  $> 40$  mAU/mL 1 month after LTx. AFP, alpha-fetoprotein; HCC, hepatocellular carcinoma; LTx, liver transplantation; mVI, microvascular invasion; PIVKA-II, protein induced by vitamin K absence or antagonist-II.
